# Supplementary material for: Loss of MAPK-activated protein kinase 2 enables potent dendritic cell-driven anti-tumour T cell response
Source: Sci Rep. 2017 Sep 18;7:11746. doi: 10.1038/s41598-017-12208-7 (PMC5603533; doi:10.1038/s41598-017-12208-7)
Supplement: Supplementary file 1 — Supplementary information [file 41598_2017_12208_MOESM1_ESM.pdf]

## SUPPLEMENTARY INFORMATION

### **Loss of MAPK-activated protein kinase 2 enables potent dendritic cell-driven anti-tumour T cell response**

Klara Soukup<sup>1,4\*</sup>, Angela Halfmann<sup>1</sup>, Barbara Dillinger<sup>1</sup>, Fiona Poyer<sup>1</sup>, Katharina Martin<sup>1</sup>, Bernadette Blauensteiner<sup>1</sup>, Maximilian Kauer<sup>2</sup>, Mario Kuttke<sup>3</sup>, Gernot Schabbauer<sup>3</sup> and Alexander M. Dohnal<sup>1,5\*</sup>

<sup>1</sup>Tumour Immunology, St. Anna Kinderkrebsforschung, Children's Cancer Research Institute, Vienna, Austria

<sup>2</sup>Bioinformatics, St. Anna Kinderkrebsforschung, Children's Cancer Research Institute, Vienna, Austria

<sup>3</sup>Institute for Physiology, Centre for Physiology and Pharmacology, Medical University of Vienna, Vienna, Austria

<sup>4</sup>Current address: Department of Fundamental Oncology, Ludwig Institute for Cancer Research, University of Lausanne, Lausanne, Switzerland

<sup>5</sup>Current address: APEIRON Biologics AG, Vienna, Austria

\*Correspondence and requests for materials should be addressed to K.S. (email: [klara.soukup@unil.ch](mailto:klara.soukup@unil.ch)) or A.M.D. (email: [alexander.dohnal@apeiron-biologics.com](mailto:alexander.dohnal@apeiron-biologics.com))

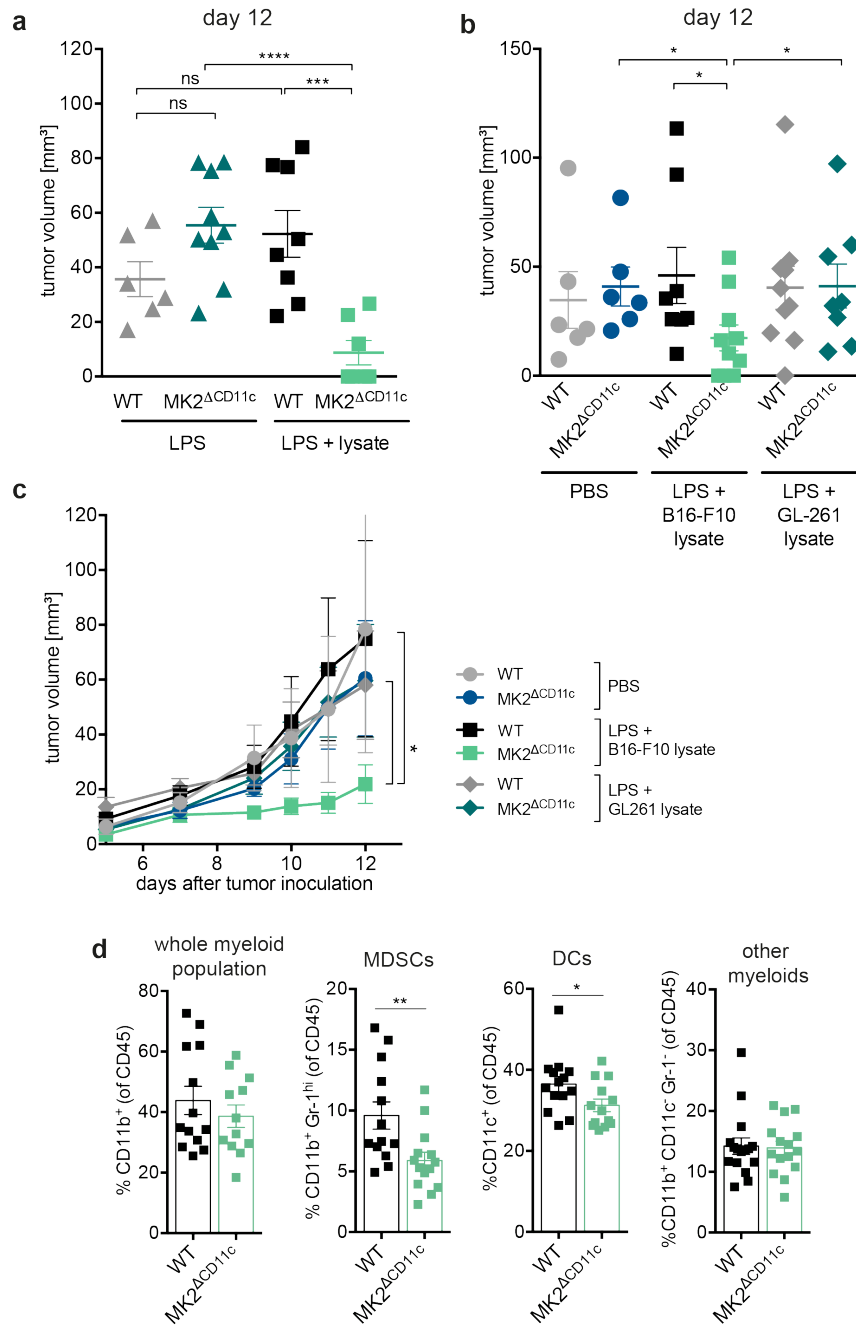

**Supplementary Figure 1. Tumours of immunized MK2<sup>ΔCD11c</sup> mice are infiltrated by fewer dendritic and immature myeloid cells.** (a-b) B16-F10 tumour volumes at day 12 post-tumour cell injection in MK2<sup>ΔCD11c</sup> and WT control mice immunized with (a) LPS alone or in combination with B16-F10 whole cell lysate or (b) PBS, LPS + B16-F10 lysate or LPS + GL-261 lysate (n = 5-8 per group, one representative of three independent experiments). (c) B16-F10 tumour growth in MK2<sup>ΔCD11c</sup> and WT mice immunized with PBS, LPS + B16-F10 or LPS + GL-261 lysate on days 5 and 9 post-tumour cell injection (n = 5-8 mice per group). (d) Mean frequencies of overall myeloid cells (CD11b<sup>+</sup>), DCs (CD11c<sup>+</sup> MHC-II<sup>+</sup>), MDSCs (CD11b<sup>+</sup> Gr-1<sup>+</sup>) and other myeloid populations (CD11b<sup>+</sup> Gr-1<sup>-</sup> CD11c<sup>-</sup>) within tumour-infiltrating CD45<sup>+</sup> leukocytes measured by flow cytometry. Each symbol represents one individual animal (n = 15-18 per group, pooled from three independent experiments). Data are presented as mean ± SEM. ns, not significant. \*P<0.05, \*\*P<0.01, \*\*\*P<0.001, \*\*\*\*P<0.0001. P-values were determined using (a-b, d) Student's *t*-test and (c) repeated-measures two-way ANOVA with Bonferroni correction for multiple comparisons.

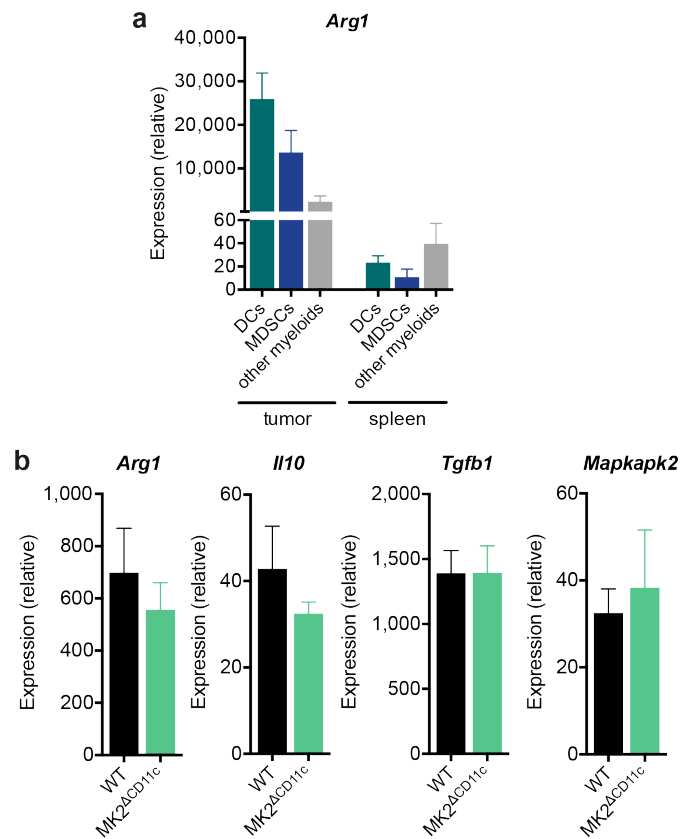

**Supplementary Figure 2. Expression of immune suppressive genes in MDSCs is not affected by CD11c-targeted MK2 deletion.** (a) Relative expression of *Arg1* in myeloid populations sorted from tumours and spleens of melanoma-bearing C57BL/6 WT mice determined by RT-qPCR and normalized to *Ubc* (n = 3). (b) Relative expression of *Arg1*, *Il10*, *Tgfb1* and *Mapkapk2* in MDSCs sorted from tumours of MK2 $\Delta$ CD11c and WT mice determined by RT-qPCR and normalized to *Ubc* (n = 4). Data are presented as mean  $\pm$  SEM. *P*-values were determined using Mann-Whitney U test (not significant).

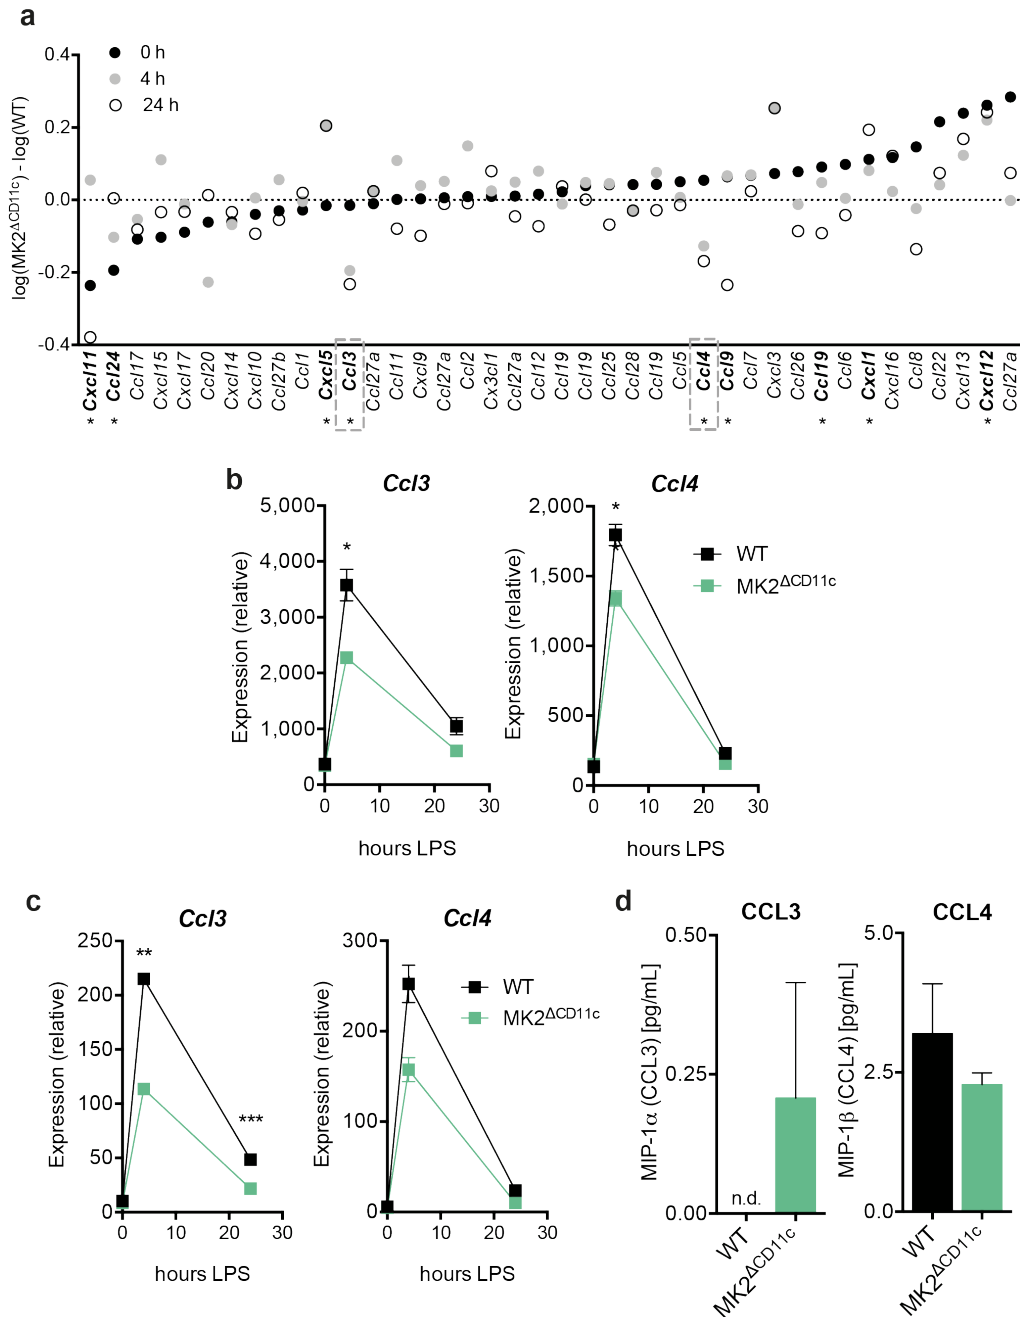

**Supplementary Figure 3. Expression of various chemokines is differentially regulated in MK2-deficient DCs.** (a) Expression of chemokines in splenic CD11c<sup>+</sup> DCs of MK2<sup>ΔCD11c</sup> and WT control mice stimulated over 24 hours with LPS by gene expression array. Differential normalized log<sub>2</sub> gene expression between genotypes at 0 (black circles), 4 (grey circles) and 24 hours (white circles) post-LPS stimulation is shown (n = 2). Genes printed in bold show significantly different expression levels between genotypes. (b-c) Kinetics of *Ccl3* and *Ccl4* expression in splenic CD11c<sup>+</sup> DCs over 24 hours of LPS stimulation by (b) gene expression array and (c) RT-qPCR normalized to *Ubc* (n = 2). (d) Serum levels of CCL3 and CCL4 in melanoma-bearing MK2<sup>ΔCD11c</sup> and WT mice measured by ProcartaPlex™ Multiplex Immunoassay (n = 5). Data are presented as mean ± SEM. n.d., not detectable. \**P* < 0.05, \*\**P* < 0.01, \*\*\**P* < 0.001. *P*-values were determined using (a-b, d) Student's *t*-test and (c) Mann-Whitney U test.

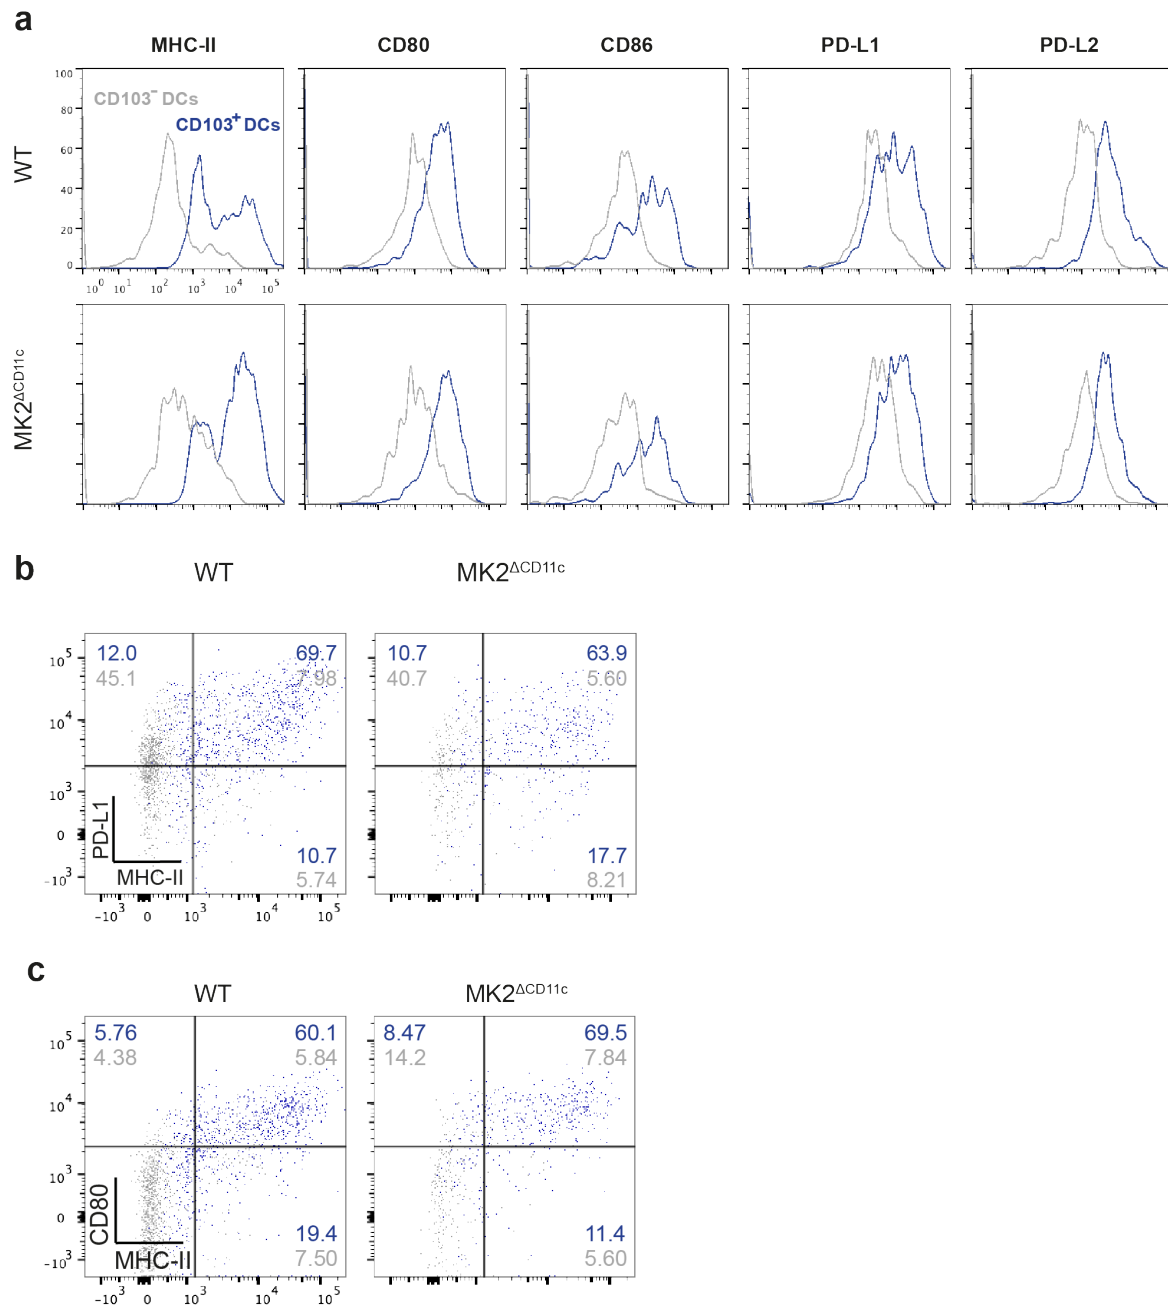

**Supplementary Figure 4. CD103<sup>+</sup> DCs in melanoma-bearing MK2<sup>ΔCD11c</sup> mice exhibit a more stimulatory profile.** (a) Representative flow cytometry histograms showing surface expression of MHC-II, CD80, CD86, PD-L1 and PD-L2 on tumour-resident CD103<sup>+</sup> (blue) vs CD103<sup>-</sup> (grey) DCs. Cells were pre-gated for live, single, CD45<sup>+</sup>, CD11c<sup>+</sup> CD103<sup>+</sup> or CD103<sup>-</sup> cells. (b-c) Representative dot plots depicting frequency of (b) MHC-II- and CD80-expressing DC subpopulations and (c) MHC-II- and PD-L1-expressing DC subsets. Frequency within parental population is indicated (blue, CD103<sup>+</sup> DCs; grey, CD103<sup>-</sup> DCs).

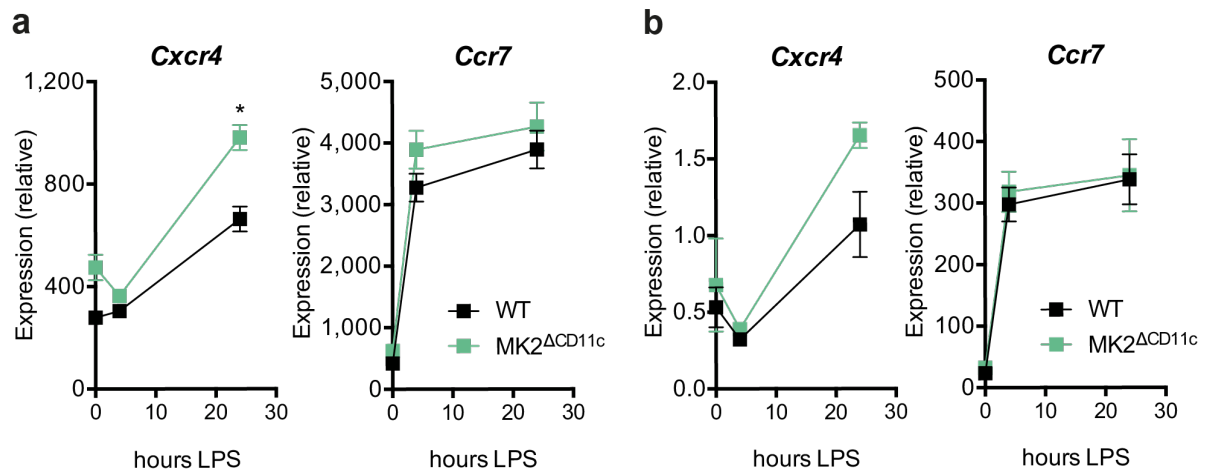

**Supplementary Figure 5. *Cxcr4* and *Ccr7* expression is enhanced upon MK2 deletion in DCs.** (a-b) Kinetics of *Ccr7* and *Cxcr4* expression in splenic CD11c<sup>+</sup> DCs over 24 hours of LPS stimulation by (a) gene expression array and (b) RT-qPCR normalized to *Ubc* (n = 2). Data are presented as mean  $\pm$  SEM. \* $P < 0.05$ .  $P$ -values were determined using (a) Student's  $t$ -test and (b) Mann-Whitney U test.

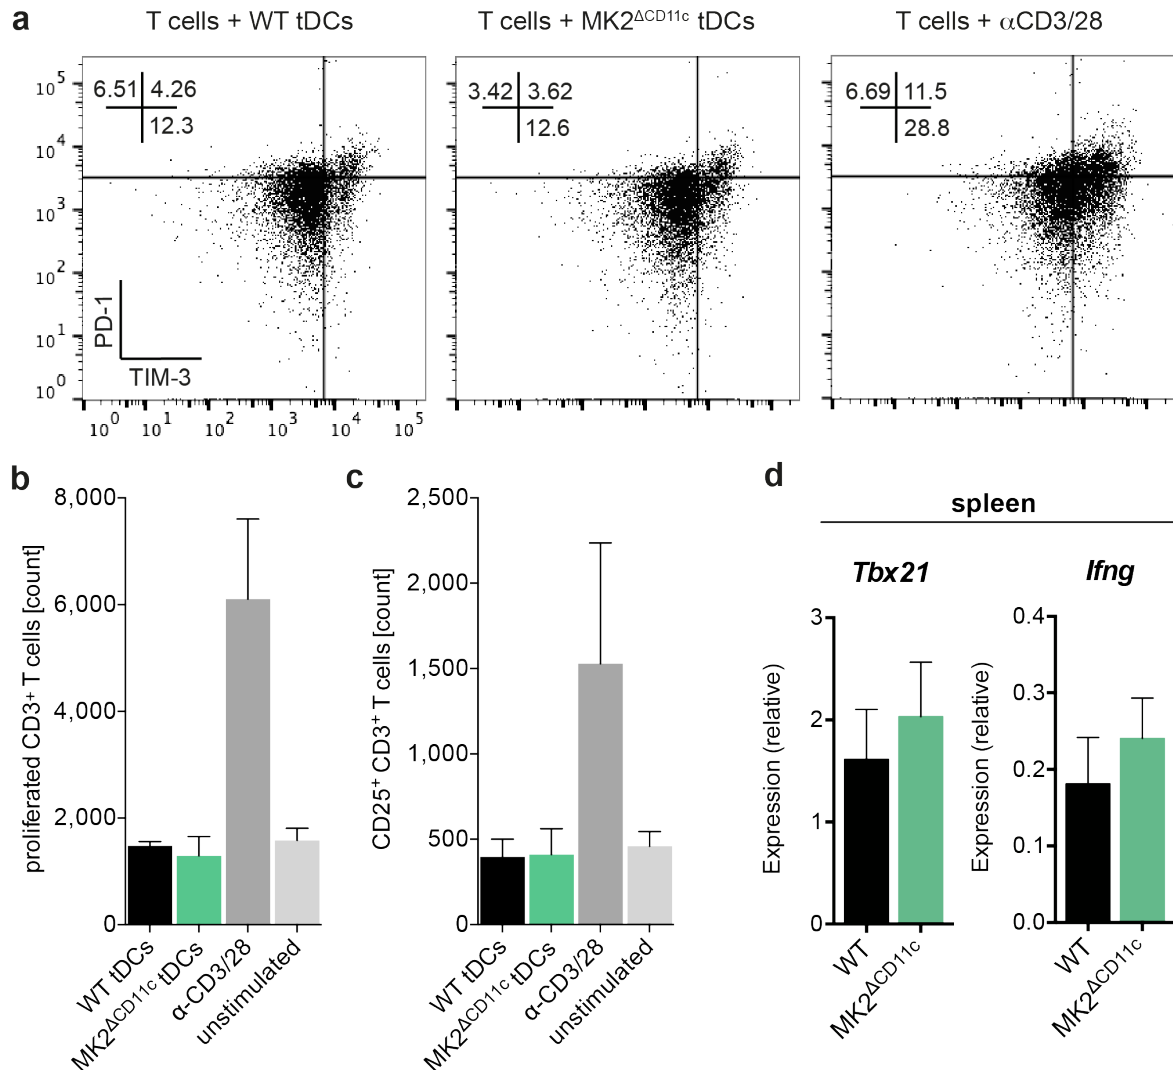

**Supplementary Figure 6. CD11c-specific MK2 deletion renders T cells less exhausted and enhances Th1 polarization.** (a) Representative dot plots depicting relative frequencies of PD-1- and TIM-3-expressing T cells after 5 days of co-culture with freshly isolated CD11c<sup>+</sup> DCs from tumours of MK2<sup>ΔCD11c</sup> and WT control mice. T cells stimulated with αCD3/28 Dynabeads served as activation control. Numbers indicate frequency within parental CD3<sup>+</sup> population (n = 3). (b) Numbers of proliferated T cells after co-culture as analysed by flow cytometry (n = 3). (c) Numbers of CD25<sup>+</sup> T cells after co-culture as analysed by flow cytometry (n = 3). (d) *Tbx21* and *Ifng* expression in frozen spleen tissue of tumour-bearing MK2<sup>ΔCD11c</sup> and WT littermate control mice by RT-qPCR and normalized to *Ubc* (n = 10-15). Data are presented as mean ± SEM. tDC, tumour-infiltrating DC. *P*-values were determined using (b-c) Student's *t*-test and (d) Mann-Whitney U test (not significant).

| Rearrangement | Productive Frequency (total) | Present in (samples) | Productive Frequency (MK2ΔCD11c) |       |       |       |       |       | Productive Frequency (WT) |       |       |        |       |       |
|---------------|------------------------------|----------------------|----------------------------------|-------|-------|-------|-------|-------|---------------------------|-------|-------|--------|-------|-------|
|               |                              |                      | KO1                              | KO2   | KO3   | KO4   | KO5   | KO6   | WT1                       | WT2   | WT3   | WT4    | WT5   | WT6   |
| CTTT...GTAC   | 1.334                        | 4                    | 0.000                            | 0.000 | 0.000 | 0.200 | 0.094 | 0.000 | 0.000                     | 0.993 | 0.000 | 0.047  | 0.000 | 0.000 |
| TCTA...GTAT   | 1.295                        | 2                    | 0.000                            | 0.000 | 0.000 | 0.798 | 0.000 | 0.000 | 0.000                     | 0.496 | 0.000 | 0.000  | 0.000 | 0.000 |
| TCAA...CTTC   | 1.505                        | 2                    | 1.310                            | 0.000 | 0.000 | 0.000 | 0.000 | 0.000 | 0.000                     | 0.000 | 0.000 | 0.000  | 0.195 | 0.000 |
| GAGA...GTAT   | 12.543                       | 2                    | 0.000                            | 0.000 | 0.000 | 0.000 | 0.000 | 0.000 | 0.000                     | 0.000 | 0.000 | 11.954 | 0.000 | 0.588 |
| GACC...CTAT   | 0.481                        | 2                    | 0.291                            | 0.000 | 0.000 | 0.000 | 0.000 | 0.000 | 0.000                     | 0.000 | 0.000 | 0.190  | 0.000 | 0.000 |
| CATA...CTAT   | 1.532                        | 2                    | 0.291                            | 0.000 | 0.000 | 0.000 | 0.000 | 0.000 | 0.000                     | 1.241 | 0.000 | 0.000  | 0.000 | 0.000 |
| CACT...CTAC   | 1.127                        | 2                    | 0.146                            | 0.000 | 0.982 | 0.000 | 0.000 | 0.000 | 0.000                     | 0.000 | 0.000 | 0.000  | 0.000 | 0.000 |
| ATTG...GTTC   | 0.735                        | 2                    | 0.000                            | 0.000 | 0.000 | 0.000 | 0.000 | 0.000 | 0.501                     | 0.000 | 0.234 | 0.000  | 0.000 | 0.000 |

**Supplementary Table 1.** Frequency of T cell receptor (TCR) clones occurring in more than one sample.
